# Supplementary material for: Interfacial contact barrier and charge carrier transport of MoS2/metal(001) heterostructures
Source: Royal Society of Chemistry journal article supplement (doi:10.1039/d3cp00009e), 2023-01-01
Supplement: d3cp00009e1.pdf [file d3cp00009e1.pdf]

## Supporting information

### **Interfacial Contact Barrier and Charge Carrier Transport of MoS<sub>2</sub>/Metal(001)**

#### **Heterostructure**

Zi-Wen Zhang<sup>1,2,a</sup>, Zhao-Sheng Liu<sup>1,2,a</sup>, Jun-Jie Zhang<sup>1,2</sup>, Bing-Ning Sun<sup>1,2</sup>, Dai-Feng Zou<sup>1,2</sup>, Guo-Zheng Nie<sup>1,2</sup>,

Mingyan Chen<sup>3</sup>, Yu-Qing Zhao<sup>1,2\*</sup>, Shaolong Jiang<sup>4\*</sup>

*<sup>1</sup>School of Physics and Electronics Science, Hunan University of Science and Technology, Xiangtan 411201, Peoples's Republic of China*

*<sup>2</sup>Hunan Provincial key Laboratory of Intelligent Sensors and New Sensor Materials, Xiangtan 411201, Hunan, Peoples's Republic of China*

*<sup>3</sup>Hongzhiwei Technology(Shanghai) Co. Ltd., 1599 Xinjinqiao Road, Pudong, Shanghai, China*

*<sup>4</sup>Department of Physics, Southern University of Science and Technology, Shenzhen 518055, China*

Fig. S1

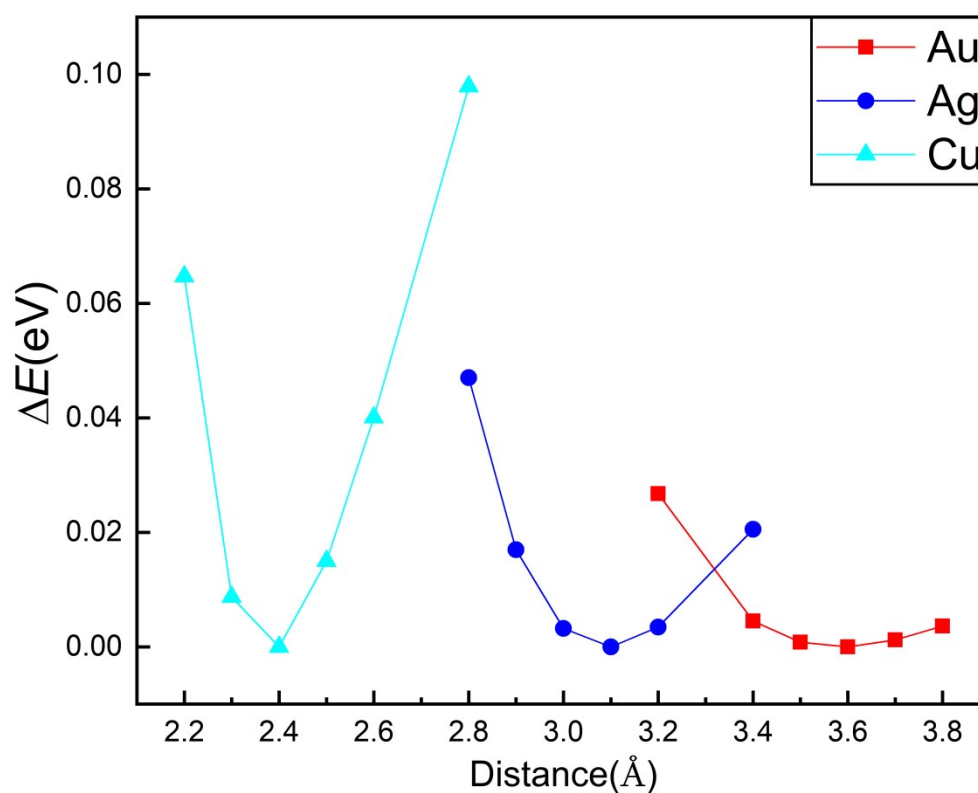

Fig S1. The function of interlayer distance  $d$  and energy difference  $\Delta E$  between interlayer distance and equilibrium distance. Red, blue and cyan lines represent  $\text{MoS}_2/\text{Au}$ ,  $\text{MoS}_2/\text{Ag}$  and  $\text{MoS}_2/\text{Cu}$  heterostructures, respectively.

Table S1

| Au | Distance (Å) | Energy (eV) | Ag | Distance (Å) | Energy (eV) | Cu | Distance (Å) | Energy (eV) |
|----|--------------|-------------|----|--------------|-------------|----|--------------|-------------|
|    | 3.2          | -101.835    |    | 2.8          | -95.048     |    | 2.2          | -105.714    |
|    | 3.4          | -101.857    |    | 2.9          | -95.078     |    | 2.3          | -105.770    |
|    | 3.5          | -101.861    |    | 3.0          | -95.092     |    | 2.4          | -105.778    |
|    | 3.6          | -101.862    |    | 3.1          | -95.095     |    | 2.5          | -105.763    |
|    | 3.7          | -101.860    |    | 3.2          | -95.092     |    | 2.6          | -105.738    |
|    | 3.8          | -101.858    |    | 3.4          | -95.075     |    | 2.8          | -105.680    |

Table S1. Calculated total energies of  $\text{MoS}_2/\text{Metals}$  (metals = Au, Ag and Cu) as the function of interlayer distance  $d$ .

Fig. S2

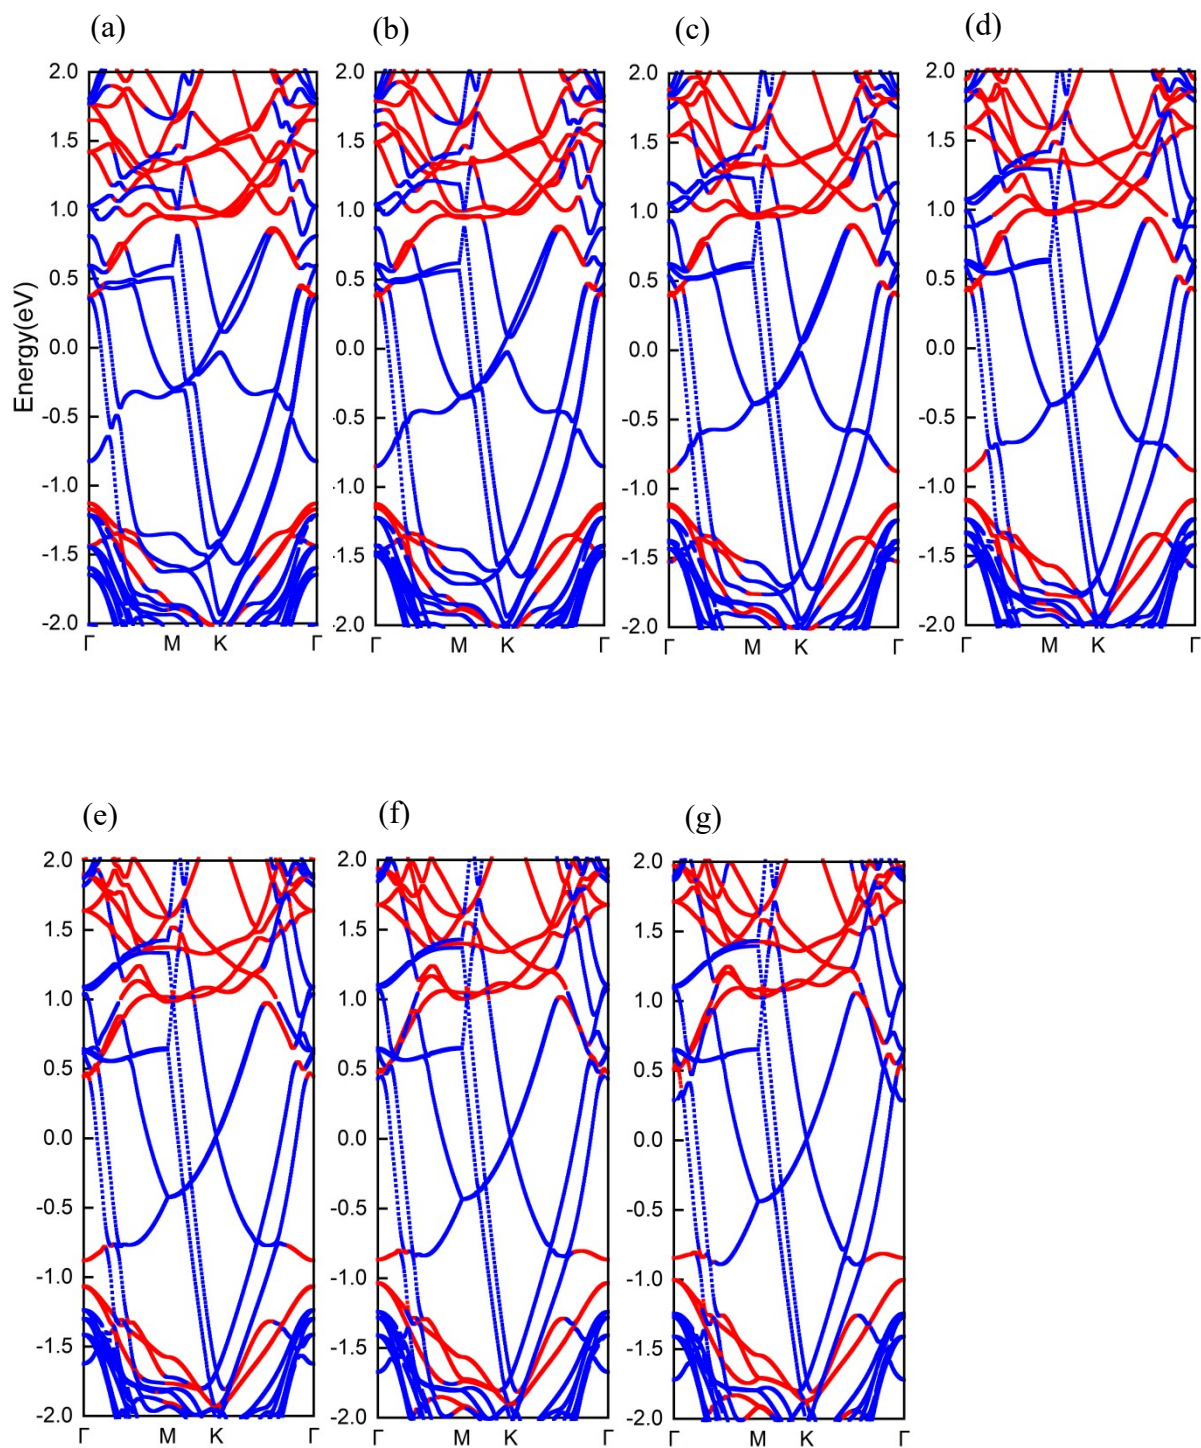

Fig S2. Projected band structure of MoS<sub>2</sub>/Au heterostructure with tunable distance (a) 2.4Å, (b)2.6Å, (c)2.8Å, (d)3.0, (e)3.2Å, (f)3.4, (g)3.6Å. The blue, and red lines represent the electronic orbital contributions of Au, MoS<sub>2</sub>, respectively.

Fig. S3

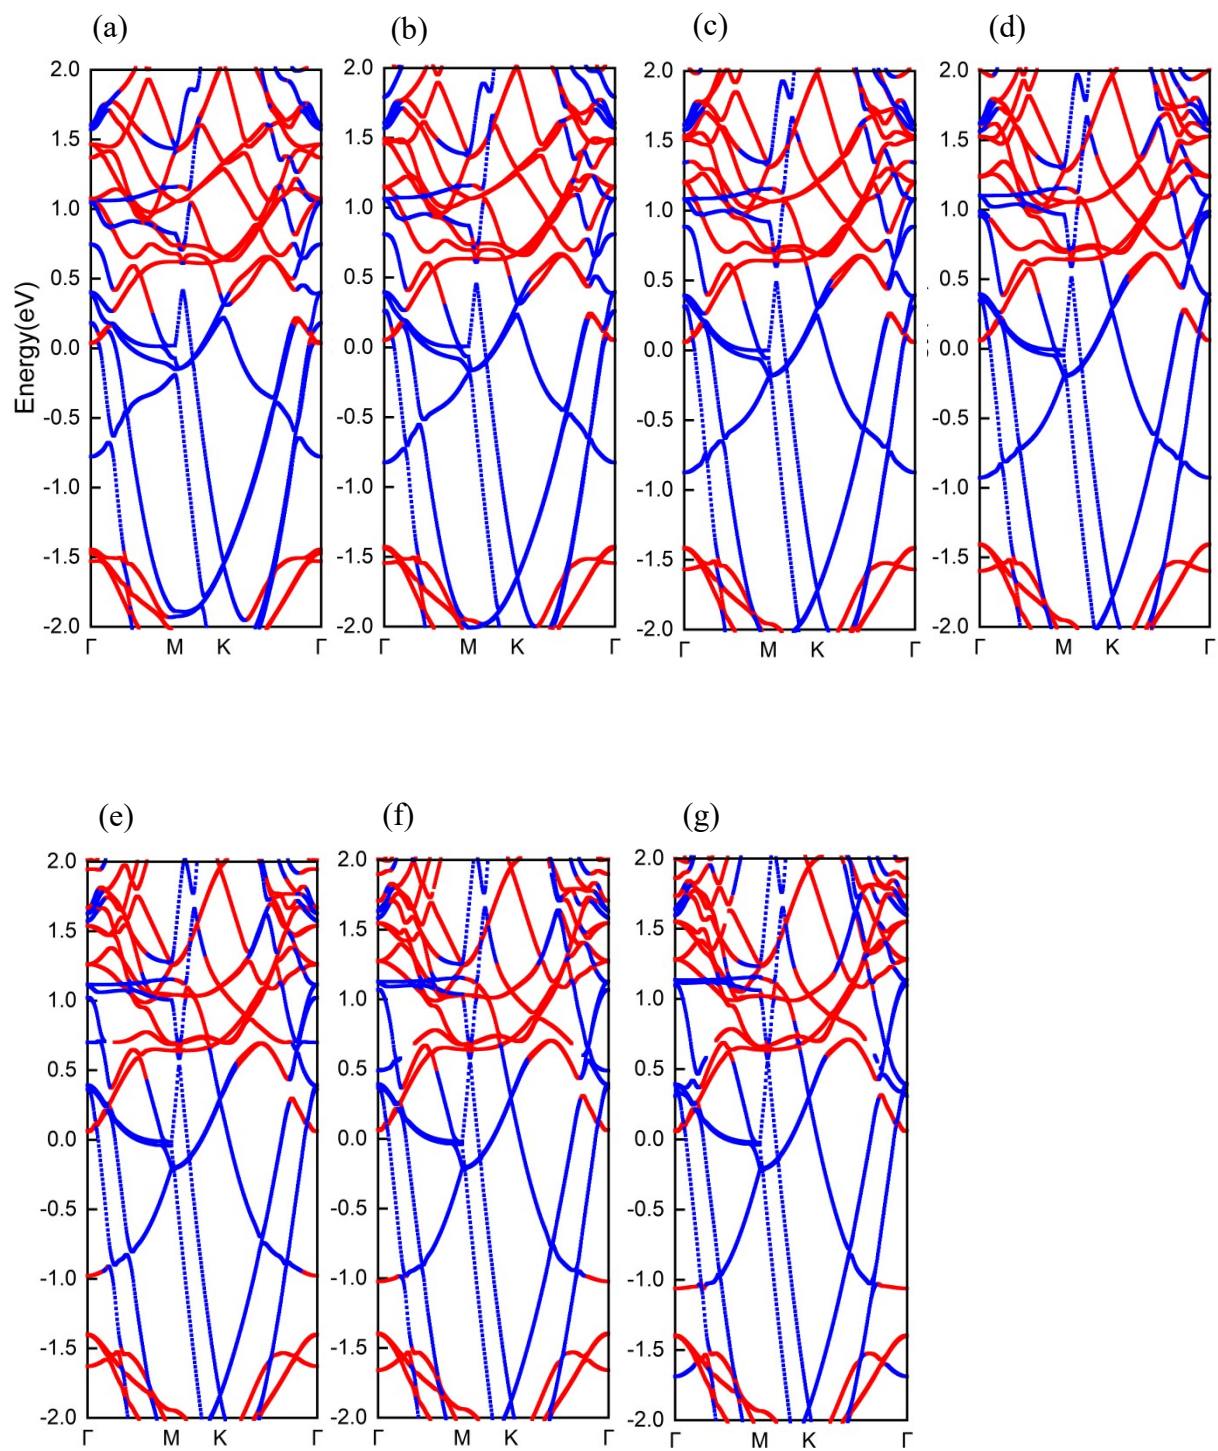

Fig. S3. Projected band structure of MoS<sub>2</sub>/Ag heterostructure with tunable distance (a) 2.4Å, (b)2.6Å, (c)2.8Å, (d)3.0, (e)3.2Å, (f)3.4, (g)3.6Å. The blue, and red lines represent the electronic orbital contributions of Ag, MoS<sub>2</sub>, respectively.

Fig. S4

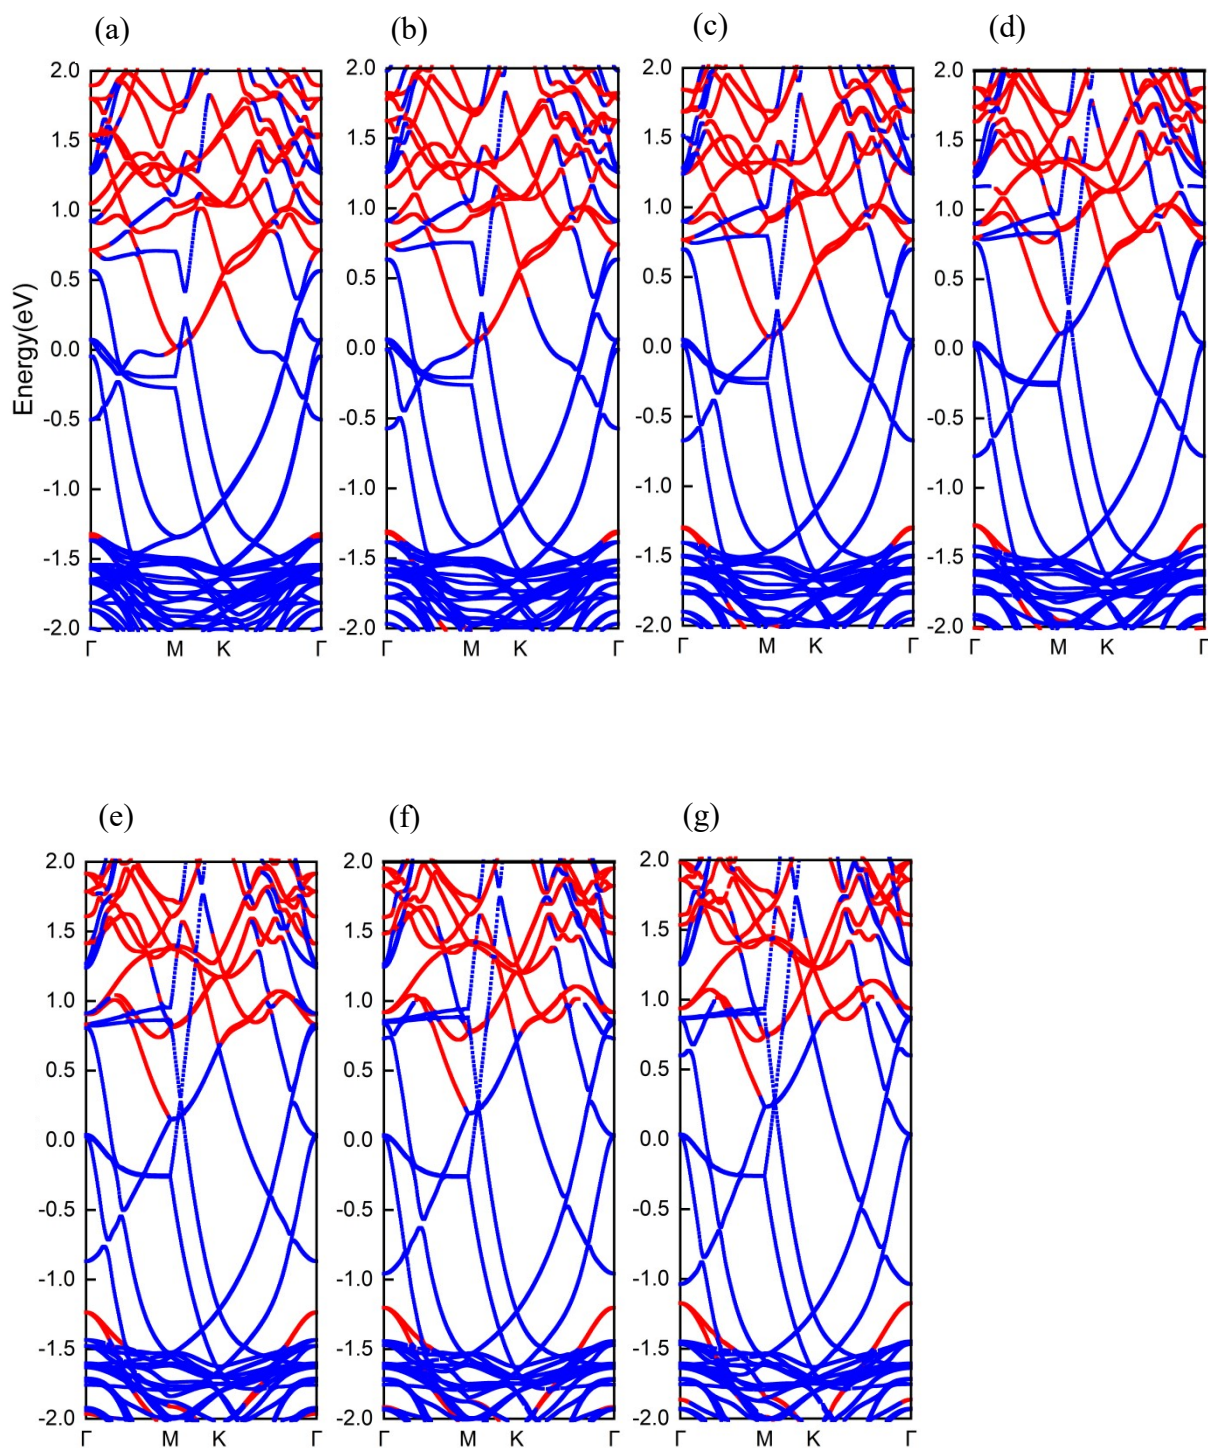

Fig. S4. Projected band structure of MoS<sub>2</sub>/Cu heterostructure with tunable distance (a)2.4Å, (b)2.6Å, (c)2.8Å, (d)3.0Å, (e)3.2Å, (f)3.4Å, (g)3.6Å. The blue, and red lines represent the electronic orbital contributions of Cu, MoS<sub>2</sub>, respectively.

Fig. S5

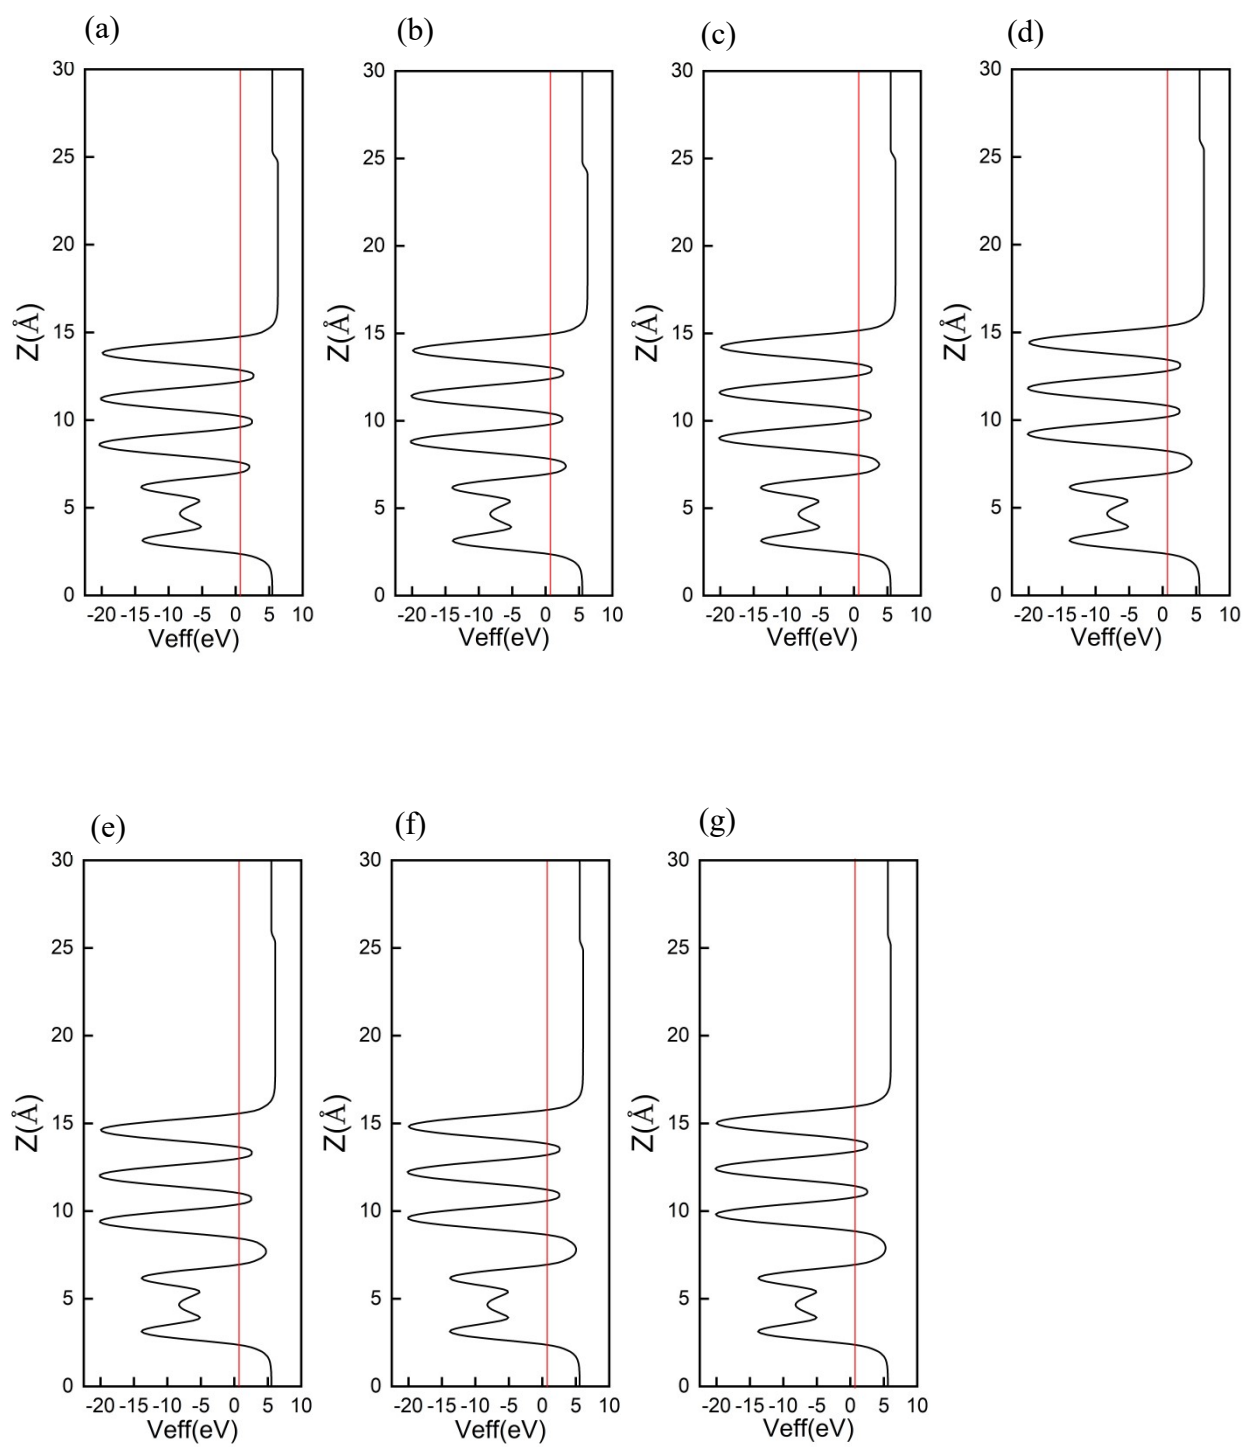

Fig S5. Effective potential profile of MoS<sub>2</sub>/Au heterostructure with tunable distance (a) 2.4Å, (b)2.6Å, (c)2.8Å, (d)3.0, (e)3.2Å, (f)3.4, (g)3.6Å. The red line represent the Fermi level.

Fig. S6

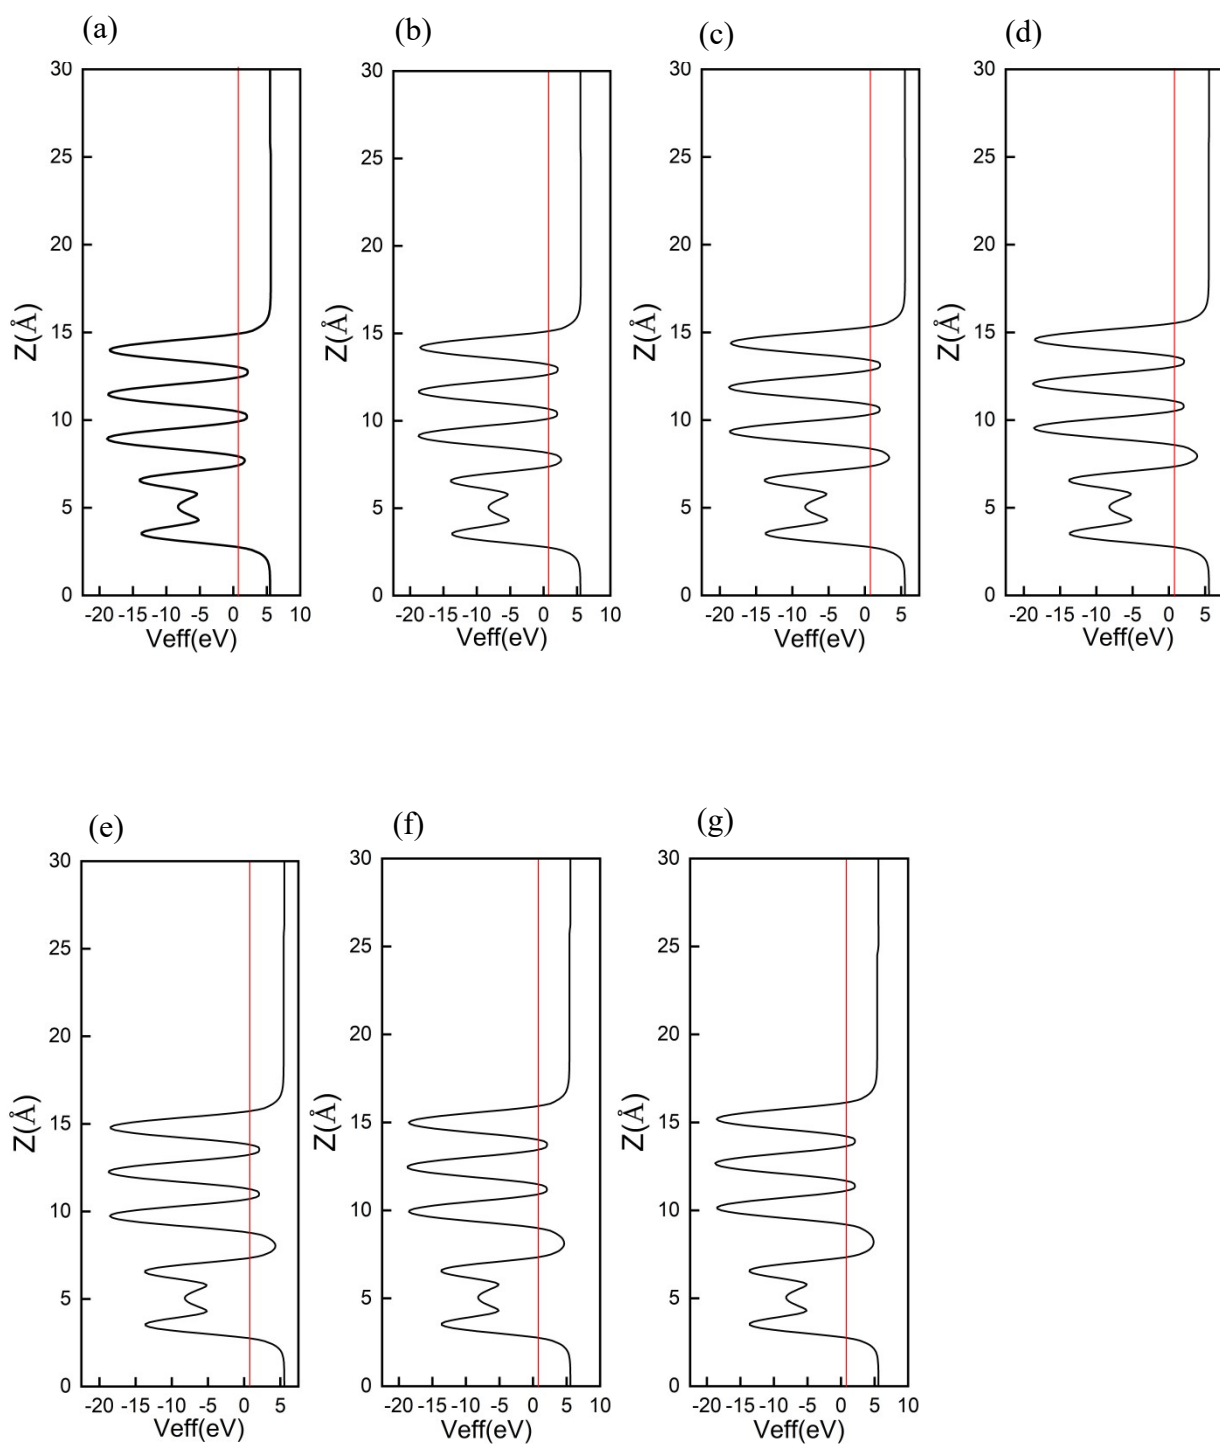

Fig S6. Effective potential profile of MoS<sub>2</sub>/Ag heterostructure with tunable distance (a) 2.4Å, (b)2.6Å, (c)2.8Å, (d)3.0, (e)3.2Å, (f)3.4, (g)3.6Å. The red line represent the Fermi level.

Fig. S7

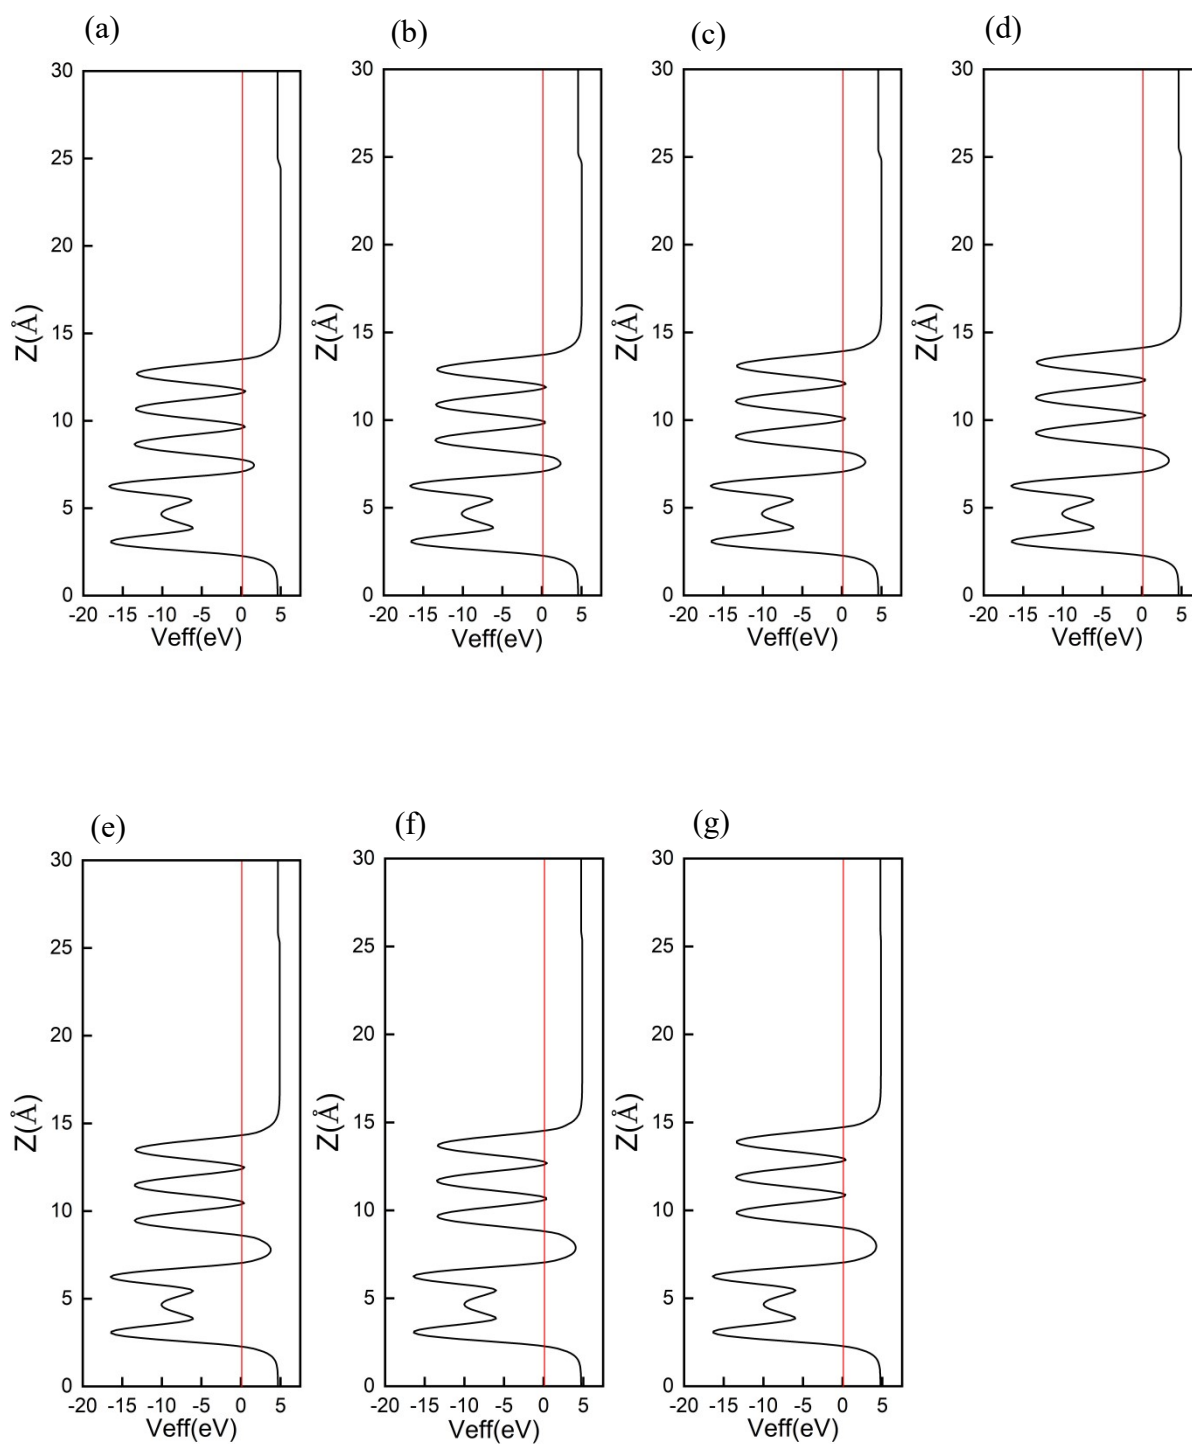

Fig S7. Effective potential profile of MoS<sub>2</sub>/Cu heterostructure with tunable distance (a) 2.4Å, (b)2.6Å, (c)2.8Å, (d)3.0, (e)3.2Å, (f)3.4, (g)3.6Å. The red line represent the Fermi level.



Fig. S8

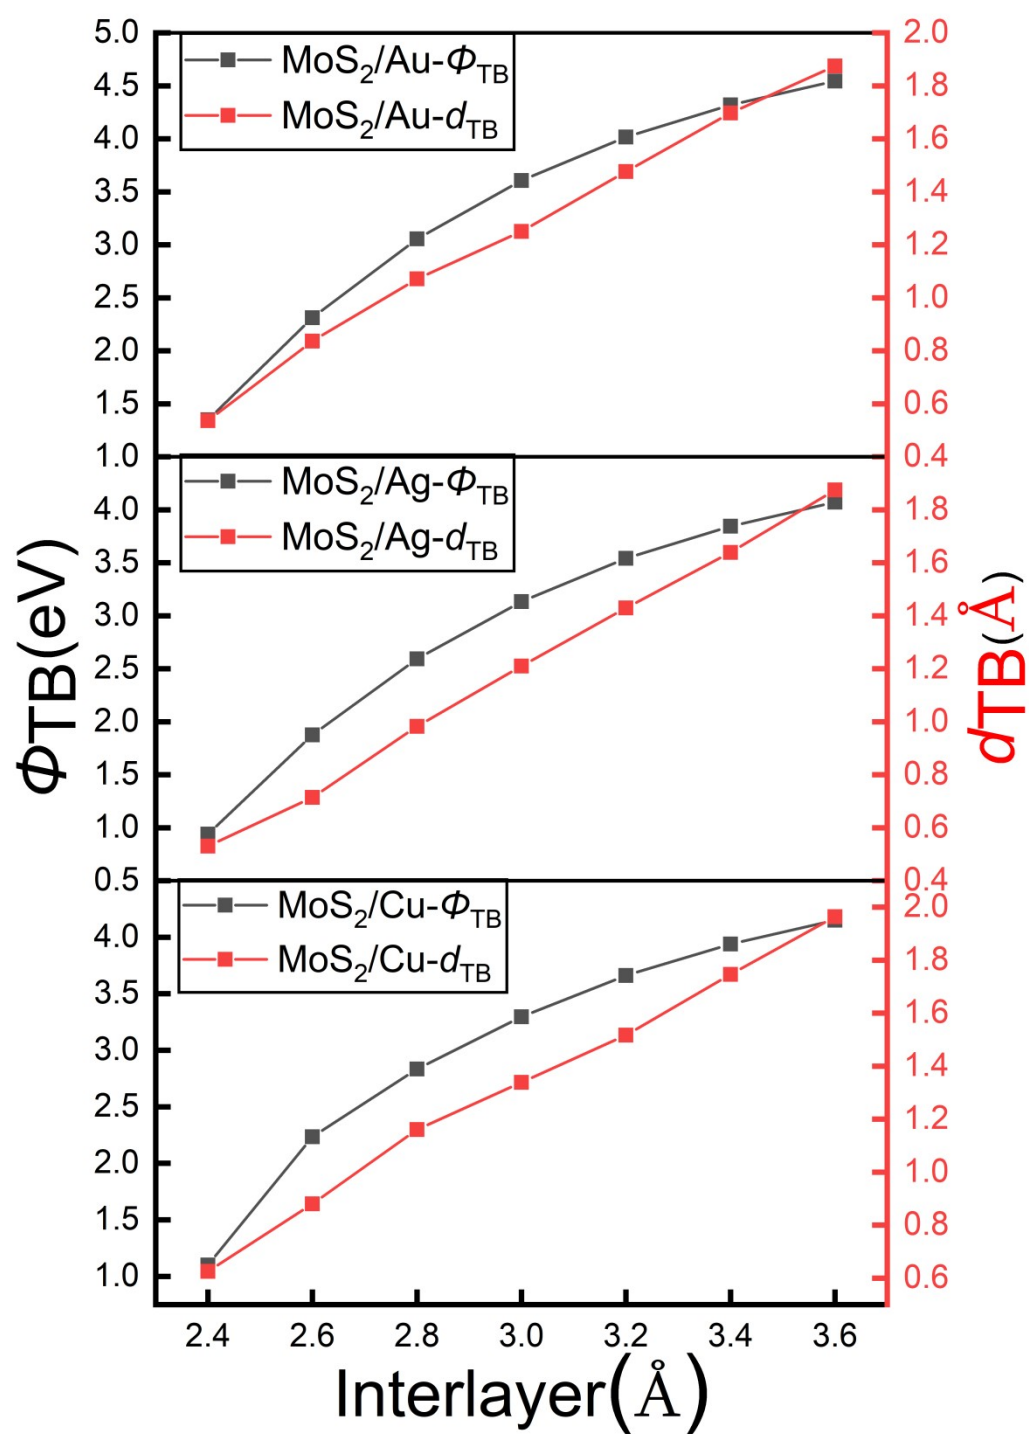

Fig S8. Barrier height( $\Phi_{TB}$ ) and width( $d_{TB}$ ) at different interlayer distance. Black and red represent the value of  $\Phi_{TB}$  and  $d_{TB}$ .

Table S2

| MoS <sub>2</sub> /Au | Distance<br>(Å) | $\Phi_{\text{TB}}$<br>(eV) | $d_{\text{TB}}$<br>(Å) | Probability<br>(%) |
|----------------------|-----------------|----------------------------|------------------------|--------------------|
|                      | 2.4             | 1.348                      | 0.536                  | 53.87              |
|                      | 2.6             | 2.311                      | 0.836                  | 28.74              |
|                      | 2.8             | 3.056                      | 1.071                  | 15.93              |
|                      | 3.0             | 3.606                      | 1.250                  | 9.74               |
|                      | 3.2             | 4.016                      | 1.476                  | 5.49               |
|                      | 3.4             | 4.319                      | 1.697                  | 3.14               |
|                      | 3.6             | 4.545                      | 1.875                  | 1.98               |
| MoS <sub>2</sub> /Ag | Distance<br>(Å) | $\Phi_{\text{TB}}$<br>(eV) | $d_{\text{TB}}$<br>(Å) | Probability<br>(%) |
|                      | 2.4             | 0.940                      | 0.530                  | 60.40              |
|                      | 2.6             | 1.876                      | 0.714                  | 38.31              |
|                      | 2.8             | 2.592                      | 0.982                  | 21.20              |
|                      | 3.0             | 3.133                      | 1.210                  | 12.23              |
|                      | 3.2             | 3.541                      | 1.429                  | 7.15               |
|                      | 3.4             | 3.844                      | 1.639                  | 4.27               |
|                      | 3.6             | 4.072                      | 1.875                  | 2.44               |
| MoS <sub>2</sub> /Cu | Distance<br>(Å) | $\Phi_{\text{TB}}$<br>(eV) | $d_{\text{TB}}$<br>(Å) | Probability<br>(%) |
|                      | 2.4             | 1.099                      | 0.625                  | 52.58              |
|                      | 2.6             | 2.234                      | 0.880                  | 27.51              |
|                      | 2.8             | 2.833                      | 1.161                  | 14.70              |
|                      | 3.0             | 3.296                      | 1.339                  | 9.21               |
|                      | 3.2             | 3.662                      | 1.517                  | 5.79               |
|                      | 3.4             | 3.940                      | 1.746                  | 3.34               |
|                      | 3.6             | 4.150                      | 1.964                  | 1.97               |

Table S2. Barrier height( $\Phi_{\text{TB}}$ ), width( $d_{\text{TB}}$ ) and the electron tunneling probability at different interlayer distance.
